# Supplementary material
Source: publisher figshare collection journal article supplement (https://sage.figshare.com/ndownloader/files/40903443)
Supplement: Supplementary file 1 [file 40903443]

Table 2. *Bivariate Correlations Among Variables*

|  | 1 | 2 | 3 | 4 | 5 | 6 | 7 |
| --- | --- | --- | --- | --- | --- | --- | --- |
| 1. Age | - |  |  |  |  |  |  |
| 2. Sexual assault history severity | .078** | - |  |  |  |  |  |
| 3. Average drinks per week | .092** | .185** | - |  |  |  |  |
| 4. Posttraumatic stress symptom severity | -.005 | .259** | .069** | - |  |  |  |
| 5. Suicidality | -.023 | .178** | .068** | .509** | - |  |  |
| 6. Current urge to harm self*** | -.009 | .128** | .031 | .340** | .451** | - |  |
| 7. Current intent to kill self*** | -.013 | .130** | .053* | .214** | .337** | .463** | - |

Note. **p*<.05; ***p*<.01; *****Current urge to harm self and current intent to suicide were only asked among those who scored 3 or higher on lifetime suicidality (SBQ-R), which included 1,429 participants. Therefore, the percentages are based on 1,429 participants for these measures.
